# Supplementary material for: Whole genome sequencing of the black grouse (Tetrao tetrix): reference guided assembly suggests faster-Z and MHC evolution
Source: PubMed Central journal article supplement (PMC4022176; doi:10.1186/1471-2164-15-180), 2014-03-06
Supplement: 12864_2013_7022_MOESM1_ESM.pdf [file 12864_2013_7022_MOESM1_ESM.pdf]

Additional file 1. The details of assembly, gene annotation, SNP discovery and nucleotide divergence of chromosome 1~28, and chromosome Z.

| chromosome | scaffold length | sequenced length | sequenced percentage | number of sequence-block | average length of sequence-block | number of N block | average length of N block | number of genes | gene density ( $\times 10E^{-6}$ ) | number of SNPs | SNP density (%) | average nucleotide divergence between black grosue and chicken | average nucleotide divergence between black grosue and turkey |
|------------|-----------------|------------------|----------------------|--------------------------|----------------------------------|-------------------|---------------------------|-----------------|------------------------------------|----------------|-----------------|----------------------------------------------------------------|---------------------------------------------------------------|
| chr1       | 195244616       | 158728977        | 0.813                | 622352                   | 255.0                            | 622351            | 58.7                      | 2365            | 12.1                               | 197846         | 0.125           | 0.096                                                          | 0.097                                                         |
| chr2       | 148806577       | 121771735        | 0.818                | 450947                   | 270.0                            | 450946            | 60.0                      | 1455            | 9.8                                | 146231         | 0.120           | 0.094                                                          | 0.095                                                         |
| chr3       | 110440357       | 94045792         | 0.852                | 338535                   | 277.8                            | 338534            | 48.4                      | 1292            | 11.7                               | 112889         | 0.120           | 0.096                                                          | 0.098                                                         |
| chr4       | 90169680        | 75127893         | 0.833                | 281184                   | 267.2                            | 281183            | 53.5                      | 1143            | 12.7                               | 84743          | 0.113           | 0.090                                                          | 0.089                                                         |
| chr5       | 59549754        | 50581140         | 0.849                | 180834                   | 279.7                            | 180833            | 49.6                      | 955             | 16.0                               | 60158          | 0.119           | 0.093                                                          | 0.098                                                         |
| chr6       | 34906596        | 30004276         | 0.860                | 103486                   | 289.9                            | 103485            | 47.4                      | 554             | 15.9                               | 35496          | 0.118           | 0.090                                                          | 0.096                                                         |
| chr7       | 36213568        | 31594475         | 0.872                | 108025                   | 292.5                            | 108024            | 42.8                      | 522             | 14.4                               | 36918          | 0.117           | 0.090                                                          | 0.095                                                         |
| chr8       | 28700717        | 25060471         | 0.873                | 82230                    | 304.8                            | 82229             | 44.3                      | 566             | 19.7                               | 28450          | 0.114           | 0.092                                                          | 0.094                                                         |
| chr9       | 23430632        | 20643053         | 0.881                | 69264                    | 298.0                            | 69263             | 40.2                      | 449             | 19.2                               | 24326          | 0.118           | 0.089                                                          | 0.093                                                         |
| chr10      | 19907917        | 17581023         | 0.883                | 56919                    | 308.9                            | 56918             | 40.9                      | 525             | 26.4                               | 21079          | 0.120           | 0.083                                                          | 0.086                                                         |
| chr11      | 19396707        | 17015365         | 0.877                | 54903                    | 309.9                            | 54902             | 43.4                      | 422             | 21.8                               | 19087          | 0.112           | 0.099                                                          | 0.107                                                         |
| chr12      | 19861678        | 17341655         | 0.873                | 57729                    | 300.4                            | 57728             | 43.7                      | 352             | 17.7                               | 20958          | 0.121           | 0.093                                                          | 0.102                                                         |
| chr13      | 17757989        | 15343371         | 0.864                | 53575                    | 286.4                            | 53574             | 45.1                      | 378             | 21.3                               | 17540          | 0.114           | 0.101                                                          | 0.110                                                         |
| chr14      | 15116539        | 12974155         | 0.858                | 46871                    | 276.8                            | 46870             | 45.7                      | 455             | 30.1                               | 14248          | 0.110           | 0.109                                                          | 0.104                                                         |

|       |            |           |       |         |       |         |       |       |       |        |       |       |       |
|-------|------------|-----------|-------|---------|-------|---------|-------|-------|-------|--------|-------|-------|-------|
| chr15 | 12642258   | 11163622  | 0.883 | 36509   | 305.8 | 36508   | 40.5  | 404   | 32.0  | 13173  | 0.118 | 0.100 | 0.104 |
| chr16 | 530826     | 117833    | 0.222 | 1110    | 106.2 | 1109    | 372.4 | 71    | 133.8 | 32     | 0.027 | 0.088 | 0.092 |
| chr17 | 10441543   | 9117519   | 0.873 | 29990   | 304.0 | 29989   | 44.2  | 333   | 31.9  | 9480   | 0.104 | 0.099 | 0.106 |
| chr18 | 11199738   | 9408799   | 0.840 | 32899   | 286.0 | 32898   | 54.4  | 306   | 27.3  | 10221  | 0.109 | 0.105 | 0.090 |
| chr19 | 9982233    | 8639582   | 0.865 | 29121   | 296.7 | 29120   | 46.1  | 320   | 32.1  | 9631   | 0.111 | 0.099 | 0.102 |
| chr20 | 14272843   | 12123883  | 0.849 | 40810   | 297.1 | 40809   | 52.7  | 354   | 24.8  | 13749  | 0.113 | 0.118 | 0.112 |
| chr21 | 6797072    | 5989529   | 0.881 | 21253   | 281.8 | 21252   | 38.0  | 256   | 37.7  | 6469   | 0.108 | 0.111 | 0.114 |
| chr22 | 4076697    | 3497232   | 0.858 | 13228   | 264.4 | 13227   | 43.8  | 129   | 31.6  | 3994   | 0.114 | 0.093 | 0.093 |
| chr23 | 5718086    | 4712397   | 0.824 | 18788   | 250.8 | 18787   | 53.5  | 241   | 42.1  | 4273   | 0.091 | 0.096 | 0.086 |
| chr24 | 6320252    | 5666250   | 0.897 | 19166   | 295.6 | 19165   | 34.1  | 204   | 32.3  | 5286   | 0.093 | 0.118 | 0.107 |
| chr25 | 2189425    | 1149133   | 0.525 | 7501    | 153.2 | 7500    | 138.7 | 139   | 63.5  | 946    | 0.082 | 0.099 | 0.118 |
| chr26 | 5328732    | 4308818   | 0.809 | 18073   | 238.4 | 18072   | 56.4  | 242   | 45.4  | 4502   | 0.104 | 0.105 | 0.105 |
| chr27 | 5202594    | 3409551   | 0.655 | 17125   | 199.1 | 17124   | 104.7 | 245   | 47.1  | 3982   | 0.117 | 0.103 | 0.109 |
| chr28 | 4735135    | 3467941   | 0.732 | 15542   | 223.1 | 15541   | 81.5  | 220   | 46.5  | 3798   | 0.110 | 0.102 | 0.104 |
| chrZ  | 82360923   | 55779024  | 0.677 | 263509  | 211.7 | 263508  | 100.9 | 709   | 8.6   | 39749  | 0.071 | 0.122 | 0.125 |
| All   | 1021612514 | 832752756 | 0.815 | 3071478 | 266.6 | 3071449 | 60.5  | 15606 | 15.3  | 949254 | 0.114 | 0.099 | 0.101 |
