# Supplementary material for: Whole genome sequencing of the black grouse (Tetrao tetrix): reference guided assembly suggests faster-Z and MHC evolution
Source: PubMed Central journal article supplement (PMC4022176; doi:10.1186/1471-2164-15-180), 2014-03-06
Supplement: 12864_2013_7022_MOESM3_ESM.pdf [file 12864_2013_7022_MOESM3_ESM.pdf]

Additional file 3. The highly divergent genomic regions with related genes identified by the 50Kb sliding window.

| Chromosome and start position | Nucleotide divergence BG vs CK | Nucleotide divergence BG vs TK | Ensembl gene ID    | Gene description                                                                                                                                                    |
|-------------------------------|--------------------------------|--------------------------------|--------------------|---------------------------------------------------------------------------------------------------------------------------------------------------------------------|
| chr1                          |                                |                                |                    |                                                                                                                                                                     |
| 6700000                       | 0.196                          | 0.212                          | ENSGALG00000006656 | FERM domain containing 4A [Source:HGNC Symbol;Acc:25491]                                                                                                            |
| 12750000                      | 0.200                          | 0.208                          | ENSGALG00000008249 | DnaJ (Hsp40) homolog, subfamily C, member 2 [Source:HGNC Symbol;Acc:13192]                                                                                          |
|                               |                                |                                | ENSGALG00000008236 | proteasome (prosome, macropain) 26S subunit, ATPase, 2 [Source:RefSeq peptide;Acc:NP_001006225]                                                                     |
|                               |                                |                                | ENSGALG00000008227 | Uncharacterized protein [Source:UniProtKB/TrEMBL;Acc:F1NDR8]                                                                                                        |
|                               |                                |                                | ENSGALG00000008222 | Uncharacterized protein [Source:UniProtKB/TrEMBL;Acc:F1NDS6]                                                                                                        |
| 14300000                      | 0.196                          | 0.210                          | ENSGALG00000008050 | HMG-box transcription factor 1 [Source:HGNC Symbol;Acc:23200]                                                                                                       |
|                               |                                |                                | ENSGALG00000008035 | component of oligomeric golgi complex 5 [Source:HGNC Symbol;Acc:14857]                                                                                              |
| 24050000                      | 0.194                          | 0.210                          | ENSGALG00000009104 | Uncharacterized protein [Source:UniProtKB/TrEMBL;Acc:E1BZ82]                                                                                                        |
|                               |                                |                                | ENSGALG00000009110 | N(alpha)-acetyltransferase 38, NatC auxiliary subunit [Source:HGNC Symbol;Acc:20471]                                                                                |
| 57000000                      | 0.200                          | 0.182                          | ENSGALG00000012863 | aarF domain containing kinase 2 [Source:HGNC Symbol;Acc:19039]                                                                                                      |
|                               |                                |                                | ENSGALG00000023078 | NADH dehydrogenase (ubiquinone) 1 beta subcomplex, 2, 8kDa [Source:HGNC Symbol;Acc:7697]                                                                            |
|                               |                                |                                | ENSGALG00000012864 | Uncharacterized protein [Source:UniProtKB/TrEMBL;Acc:F1P1M4]                                                                                                        |
| 70050000                      | 0.204                          | 0.194                          | ENSGALG00000014218 | PHD finger protein 21B [Source:HGNC Symbol;Acc:25161]                                                                                                               |
| 74900000                      | 0.178                          | 0.204                          | ENSGALG00000014346 | tetraspanin 9 [Source:HGNC Symbol;Acc:21640]                                                                                                                        |
| 77450000                      | 0.208                          | 0.208                          | ENSGALG00000014749 | EPH receptor B6 [Source:RefSeq peptide;Acc:NP_001004387]                                                                                                            |
| 104550000                     | 0.198                          | 0.200                          | ENSGALG00000015938 | interferon (alpha, beta and omega) receptor 2 [Source:RefSeq peptide;Acc:NP_990189]                                                                                 |
| 104700000                     | 0.196                          | 0.200                          | ENSGALG00000015983 | phosphoribosylglycinamide formyltransferase, phosphoribosylglycinamide synthetase, phosphoribosylaminoimidazole synthetase [Source:RefSeq peptide;Acc:NP_001001469] |
| 104800000                     | 0.172                          | 0.200                          | ENSGALG00000015992 | crystallin, zeta (quinone reductase)-like 1 [Source:HGNC Symbol;Acc:2420]                                                                                           |
| 129450000                     | 0.182                          | 0.204                          | ENSGALG00000016727 | PHD finger protein 16 [Source:HGNC Symbol;Acc:22982]                                                                                                                |
| chr2                          |                                |                                |                    |                                                                                                                                                                     |
| 25050000                      | 0.206                          | 0.178                          | ENSGALG00000010704 | Uncharacterized protein [Source:UniProtKB/TrEMBL;Acc:F1NS19]                                                                                                        |
| 27400000                      | 0.188                          | 0.204                          | ENSGALG00000010780 | ets variant gene 1 [Source:RefSeq peptide;Acc:NP_990248]                                                                                                            |
| 95500000                      | 0.210                          | 0.206                          | ENSGALG00000013782 | cadherin 7, type 2 [Source:RefSeq peptide;Acc:NP_989518]                                                                                                            |

|           |       |       |                    |                                                                                                                  |
|-----------|-------|-------|--------------------|------------------------------------------------------------------------------------------------------------------|
| 97100000  | 0.220 | 0.220 | ENSGALG00000013853 | Uncharacterized protein<br>[Source:UniProtKB/TrEMBL;Acc:E1BZ74]                                                  |
| 102800000 | 0.194 | 0.200 | ENSGALG00000015056 | laminin, alpha 3 [Source:HGNC Symbol;Acc:6483]                                                                   |
| chr3      |       |       |                    |                                                                                                                  |
| 22200000  | 0.168 | 0.208 | ENSGALG00000009896 | transcriptional regulating factor 1 [Source:HGNC Symbol;Acc:18273]                                               |
| 44850000  | 0.212 | 0.182 | ENSGALG00000011624 | poly(A)-specific ribonuclease (PARN)-like domain containing 1 [Source:HGNC Symbol;Acc:21185]                     |
|           |       |       | ENSGALG00000011625 | mitochondrial ribosomal protein L18 [Source:HGNC Symbol;Acc:14477]                                               |
|           |       |       | ENSGALG00000017853 | Small nucleolar RNA SNORA29<br>[Source:RFAM;Acc:RF00429]                                                         |
|           |       |       | ENSGALG00000011637 | t-complex 1 [Source:RefSeq peptide;Acc:NP_001006405]                                                             |
|           |       |       | ENSGALG00000025629 | Small nucleolar RNA SNORA20<br>[Source:RFAM;Acc:RF00401]                                                         |
|           |       |       | ENSGALG00000011659 | acetyl-Coenzyme A acetyltransferase 2 (acetoacetyl Coenzyme A thiolase) [Source:RefSeq peptide;Acc:NP_001034376] |
| 44950000  | 0.248 | 0.244 | ENSGALG00000011660 | Wilms tumor 1 associated protein [Source:HGNC Symbol;Acc:16846]                                                  |
|           |       |       | ENSGALG00000011661 | superoxide dismutase 2, mitochondrial [Source:RefSeq peptide;Acc:NP_989542]                                      |
| 47900000  | 0.202 | 0.222 | ENSGALG00000012395 | pleckstrin homology domain containing, family G (with RhoGef domain) member 1 [Source:HGNC Symbol;Acc:20884]     |
| 50350000  | 0.204 | 0.192 | ENSGALG00000023054 | Uncharacterized protein<br>[Source:UniProtKB/TrEMBL;Acc:F1NKH8]                                                  |
| 74500000  | 0.184 | 0.200 | ENSGALG00000015596 | Uncharacterized protein<br>[Source:UniProtKB/TrEMBL;Acc:E1C063]                                                  |
| chr4      |       |       |                    |                                                                                                                  |
| 17650000  | 0.188 | 0.202 | ENSGALG00000009096 | myotubularin 1 [Source:HGNC Symbol;Acc:7448]                                                                     |
| 19050000  | 0.196 | 0.210 | ENSGALG00000009192 | SLIT and NTRK-like family, member 2<br>[Source:HGNC Symbol;Acc:13449]                                            |
| 19150000  | 0.214 | 0.192 | ENSGALG00000009239 | Uncharacterized protein<br>[Source:UniProtKB/TrEMBL;Acc:F1NUH0]                                                  |
|           |       |       | ENSGALG00000009237 | Toll-like receptor 2 type-1 [Source:UniProtKB/Swiss-Prot;Acc:Q9DD78]                                             |
| 23550000  | 0.220 | 0.192 | ENSGALG00000009567 | tollloid-like 1 [Source:RefSeq peptide;Acc:NP_990034]                                                            |
| 54100000  | 0.180 | 0.208 | ENSGALG00000011990 | ubiquitin specific peptidase 53 [Source:HGNC Symbol;Acc:29255]                                                   |
|           |       |       | ENSGALG00000020171 | Uncharacterized protein<br>[Source:UniProtKB/TrEMBL;Acc:E1C6U0]                                                  |
| chr5      |       |       |                    |                                                                                                                  |
| 14500000  | 0.206 | 0.208 | ENSGALG00000006799 | adaptor-related protein complex 2, alpha 2 subunit<br>[Source:RefSeq peptide;Acc:NP_001012914]                   |
|           |       |       | ENSGALG00000006830 | Uncharacterized protein<br>[Source:UniProtKB/TrEMBL;Acc:F1NER5]                                                  |
| 22550000  | 0.198 | 0.202 | ENSGALG00000008255 | chromosome 11 open reading frame 49 [Source:HGNC Symbol;Acc:28720]                                               |
| 35350000  | 0.240 | 0.244 | ENSGALG00000023135 | signal recognition particle 54kDa [Source:HGNC Symbol;Acc:11301]                                                 |
|           |       |       | ENSGALG00000010046 | hypothetical protein LOC423323 [Source:RefSeq peptide;Acc:NP_001026373]                                          |
|           |       |       | ENSGALG00000010052 | protein phosphatase 2, regulatory subunit B", gamma<br>[Source:HGNC Symbol;Acc:17485]                            |
| 35450000  | 0.232 | 0.240 | ENSGALG00000010063 | Rel-associated pp40 [Source:RefSeq peptide;Acc:NP_001001472]                                                     |

|       |          |       |       |                    |                                                                                                            |
|-------|----------|-------|-------|--------------------|------------------------------------------------------------------------------------------------------------|
|       | 3560000  | 0.240 | 0.238 | ENSGALG00000010093 | breast cancer metastasis-suppressor 1-like<br>[Source:RefSeq peptide;Acc:NP_001007936]                     |
| chr6  |          |       |       |                    |                                                                                                            |
|       | 4250000  | 0.180 | 0.208 | ENSGALG00000002543 | chondroitin sulfate N-acetylgalactosaminyltransferase 2<br>[Source:HGNC Symbol;Acc:24292]                  |
|       | 4300000  | 0.200 | 0.216 | ENSGALG00000002555 | ret proto-oncogene [Source:RefSeq<br>peptide;Acc:NP_990521]                                                |
|       | 6900000  | 0.212 | 0.200 |                    |                                                                                                            |
| chr8  |          |       |       |                    |                                                                                                            |
|       | 50000    | 0.194 | 0.202 | ENSGALG00000021244 | Uncharacterized protein<br>[Source:UniProtKB/TrEMBL;Acc:E1BYX1]                                            |
|       | 2500000  | 0.188 | 0.202 | ENSGALG00000002305 | zinc finger and BTB domain containing 41<br>[Source:HGNC Symbol;Acc:24819]                                 |
|       | 7700000  | 0.208 | 0.204 | ENSGALG00000004775 | glycosyltransferase 25 domain containing 2<br>[Source:HGNC Symbol;Acc:16790]                               |
|       |          |       |       | ENSGALG00000004782 | tRNA splicing endonuclease 15 homolog (S.<br>cerevisiae) [Source:HGNC Symbol;Acc:16791]                    |
|       |          |       |       | ENSGALG00000004784 | Uncharacterized protein<br>[Source:UniProtKB/TrEMBL;Acc:F1NG28]                                            |
| chr11 |          |       |       |                    |                                                                                                            |
|       | 9850000  | 0.174 | 0.204 | ENSGALG00000004899 | Uncharacterized protein<br>[Source:UniProtKB/TrEMBL;Acc:F1NIQ9]                                            |
| chr15 |          |       |       |                    |                                                                                                            |
|       | 5650000  | 0.204 | 0.188 | ENSGALG00000004343 | Uncharacterized protein<br>[Source:UniProtKB/TrEMBL;Acc:F1NVJ0]                                            |
|       |          |       |       | ENSGALG00000004352 | proteasome (prosome, macropain) 26S subunit, non-<br>ATPase, 9 [Source:RefSeq<br>peptide;Acc:NP_001006189] |
|       |          |       |       | ENSGALG00000004365 | WD repeat domain 66 [Source:HGNC<br>Symbol;Acc:28506]                                                      |
|       |          |       |       | ENSGALG00000004379 | B-cell CLL/lymphoma 7A [Source:HGNC<br>Symbol;Acc:1004]                                                    |
|       |          |       |       | ENSGALG00000025437 | gga-mir-762 [Source:miRBase;Acc:MI0008209]                                                                 |
| chr18 |          |       |       |                    |                                                                                                            |
|       | 5600000  | 0.256 | 0.276 | ENSGALG00000003007 | Uncharacterized protein<br>[Source:UniProtKB/TrEMBL;Acc:F1NAQ6]                                            |
| chr20 |          |       |       |                    |                                                                                                            |
|       | 700000   | 0.268 | 0.240 | ENSGALG00000001420 | hypothetical protein LOC419128 [Source:RefSeq<br>peptide;Acc:NP_001026017]                                 |
| chrZ  |          |       |       |                    |                                                                                                            |
|       | 1500000  | 0.198 | 0.210 | ENSGALG00000010056 | Uncharacterized protein<br>[Source:UniProtKB/TrEMBL;Acc:F1N881]                                            |
|       | 15000000 | 0.202 | 0.204 | ENSGALG00000014884 | Uncharacterized protein<br>[Source:UniProtKB/TrEMBL;Acc:E1BWH2]                                            |
