# Supplementary material for: Whole genome sequencing of the black grouse (Tetrao tetrix): reference guided assembly suggests faster-Z and MHC evolution
Source: PubMed Central journal article supplement (PMC4022176; doi:10.1186/1471-2164-15-180), 2014-03-06
Supplement: 12864_2013_7022_MOESM4_ESM.pdf [file 12864_2013_7022_MOESM4_ESM.pdf]

Additional file 4 – Comparison of the first-step assembly using different programs.

|                            | <b>Velvet</b> | <b>ABySS</b> | <b>SOAPdenovo</b> |
|----------------------------|---------------|--------------|-------------------|
| <b>Number of contigs</b>   | 987378        | 1178635      | 1298366           |
| <b>Total length (bp)</b>   | 847973941     | 897476852    | 937254489         |
| <b>Average length (bp)</b> | 709           | 657          | 722               |
| <b>N50 (bp)</b>            | 1081          | 933          | 1238              |
